# Supplementary material
Source: PubMed Central journal article supplement (PMC4076084)

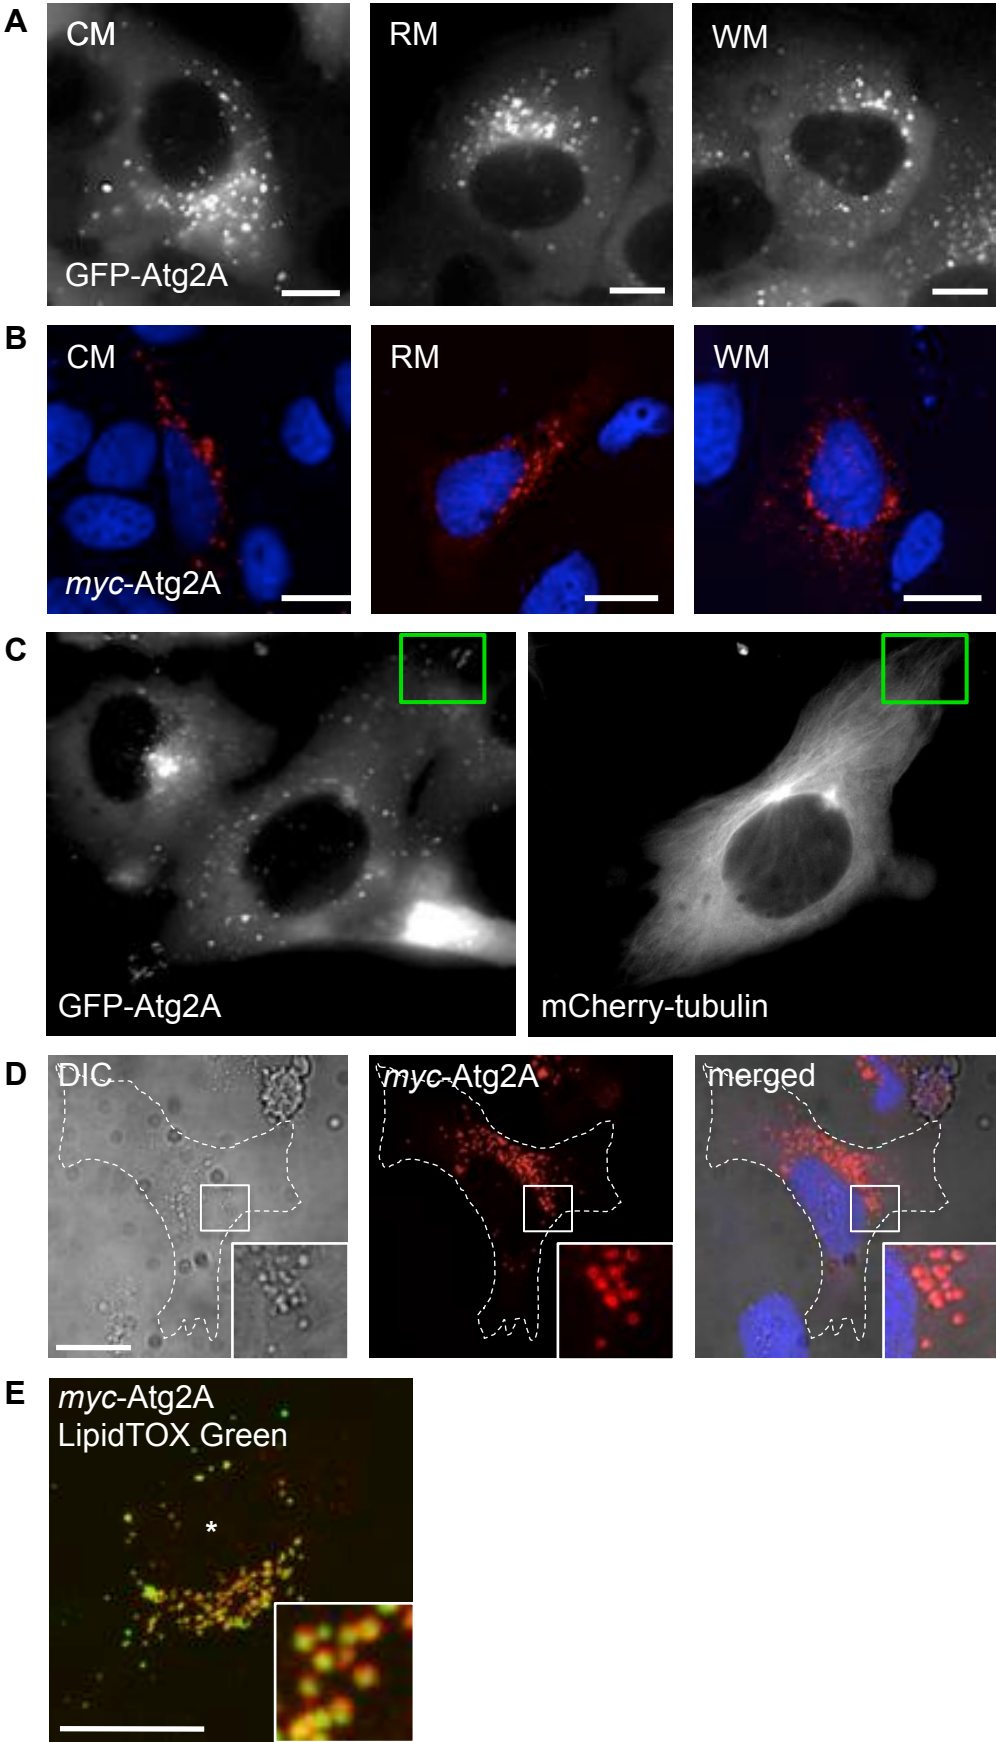

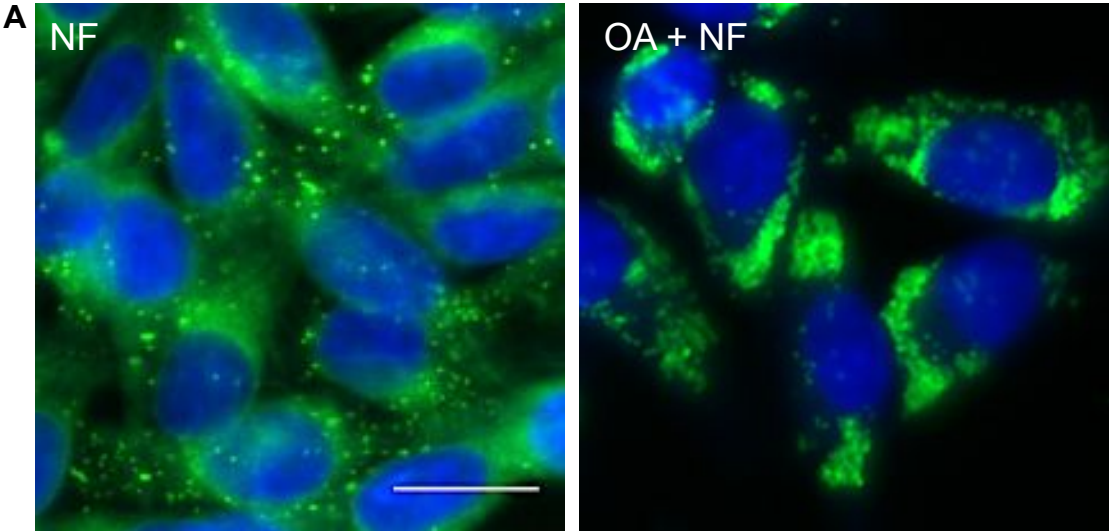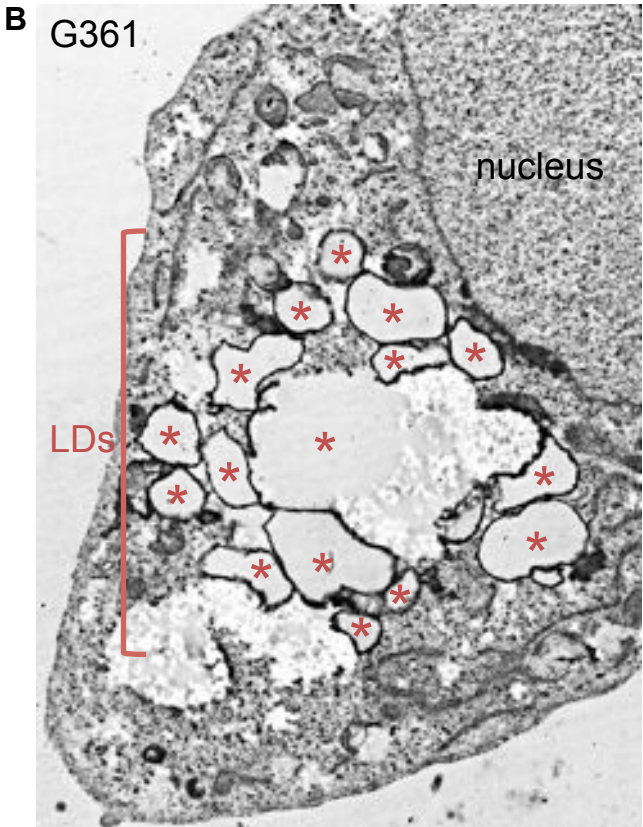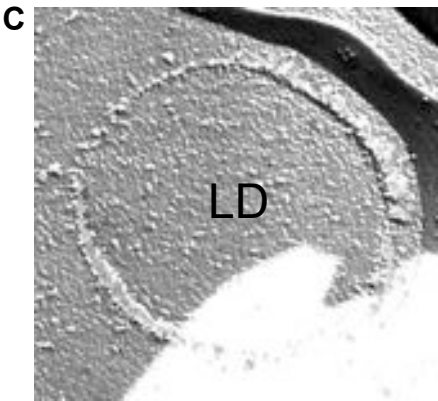

**Suppl. Fig. S3**

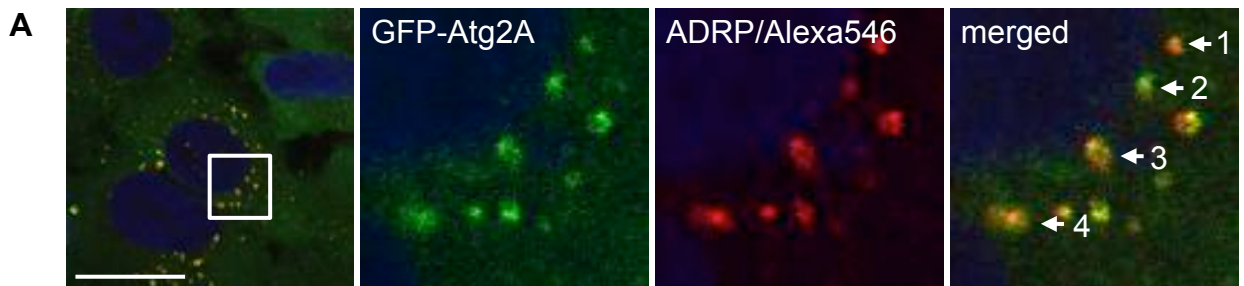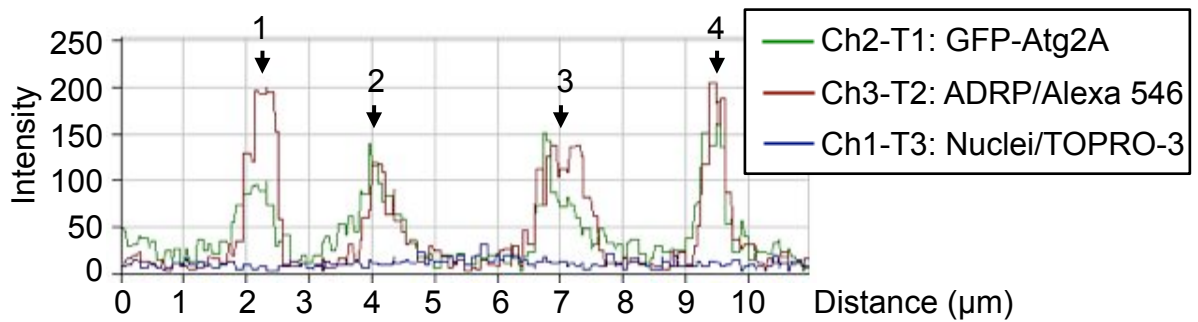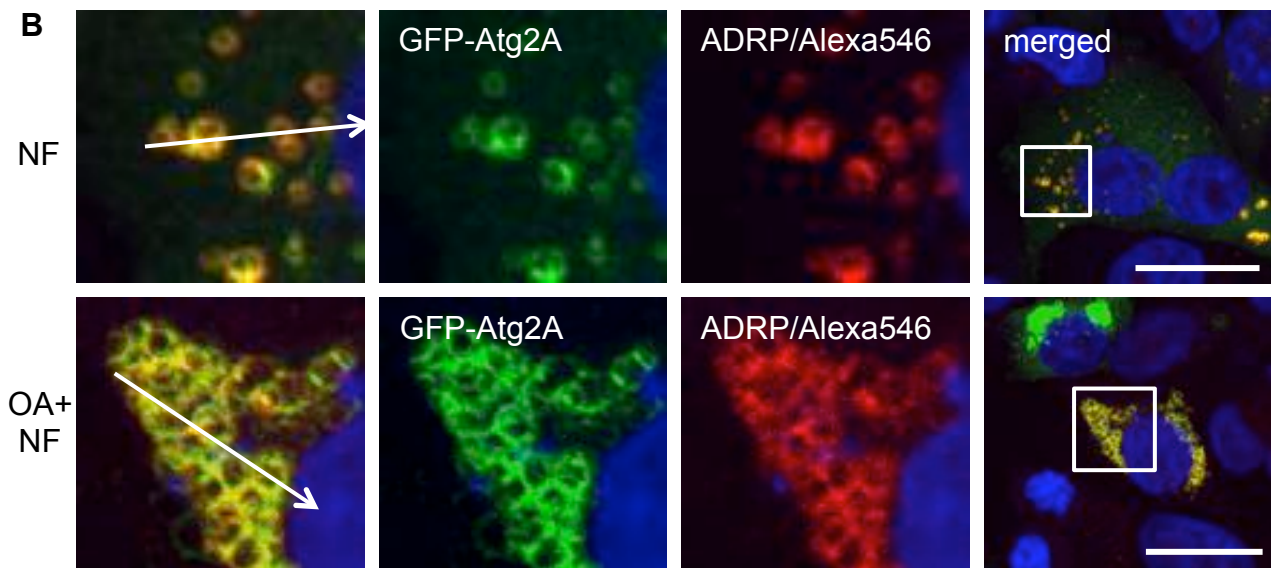

— Ch2-T1: GFP-Atg2A    — Ch3-T2: ADRP/Alexa 546    — Ch1-T3: Nuclei/TOPRO-3

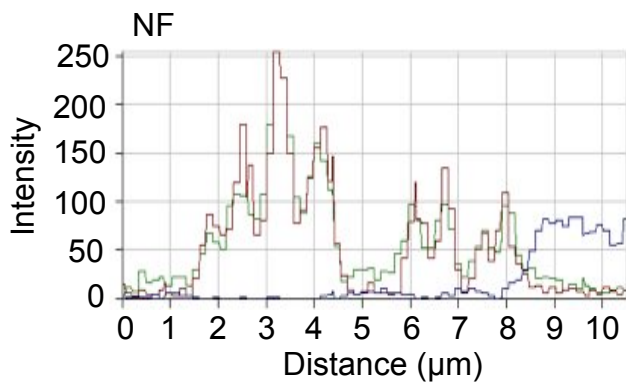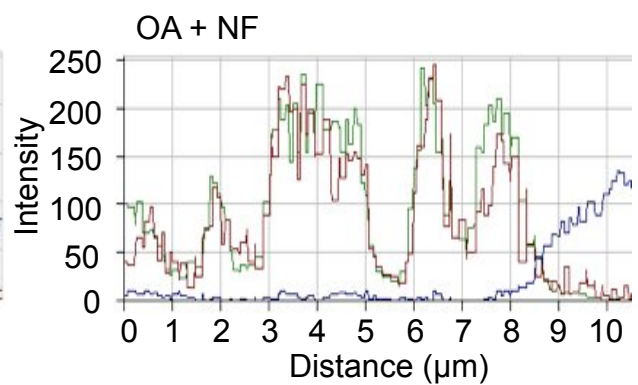

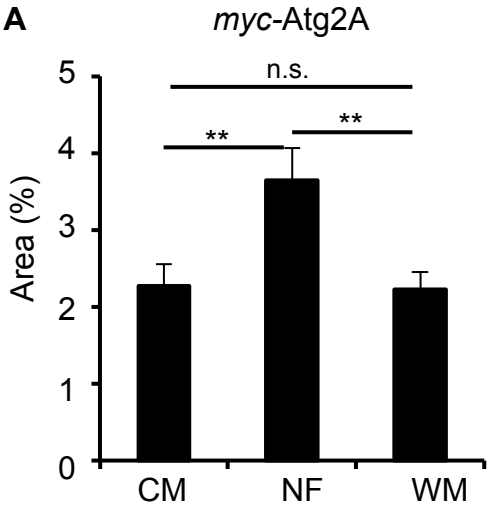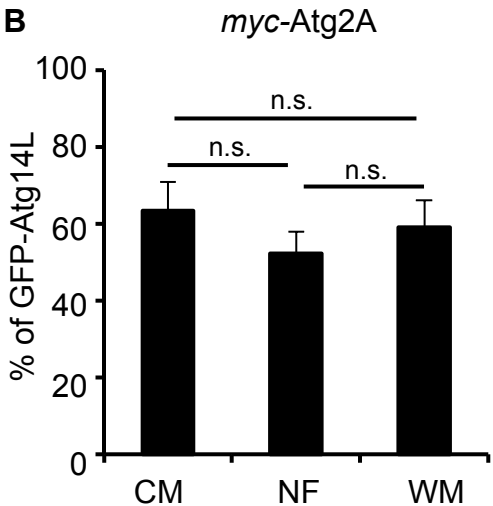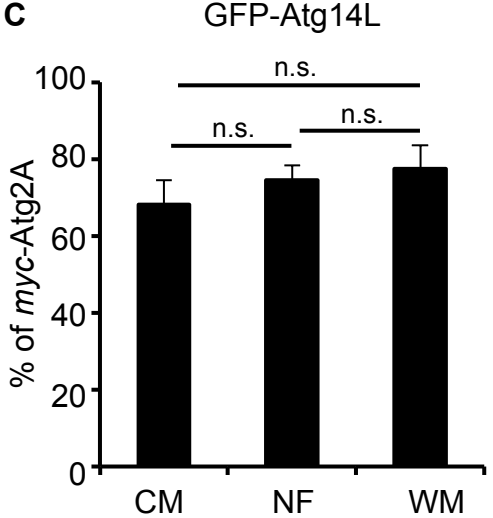

**Suppl. Fig. S5**

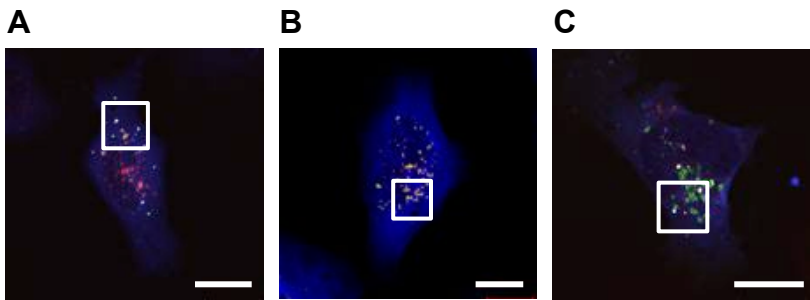

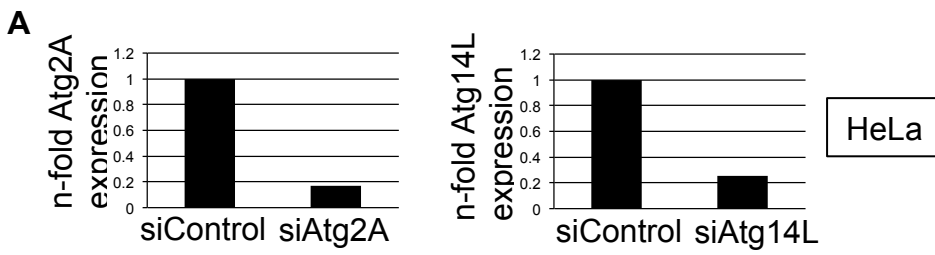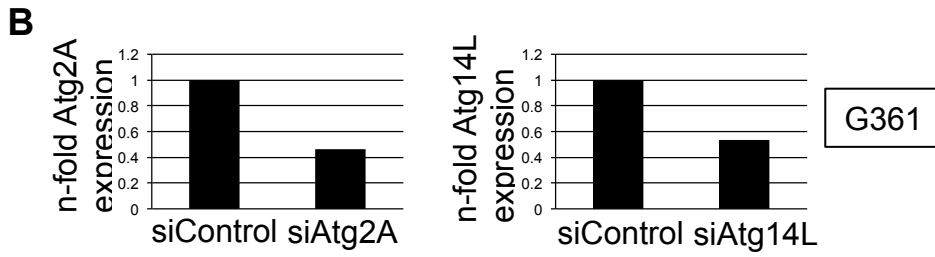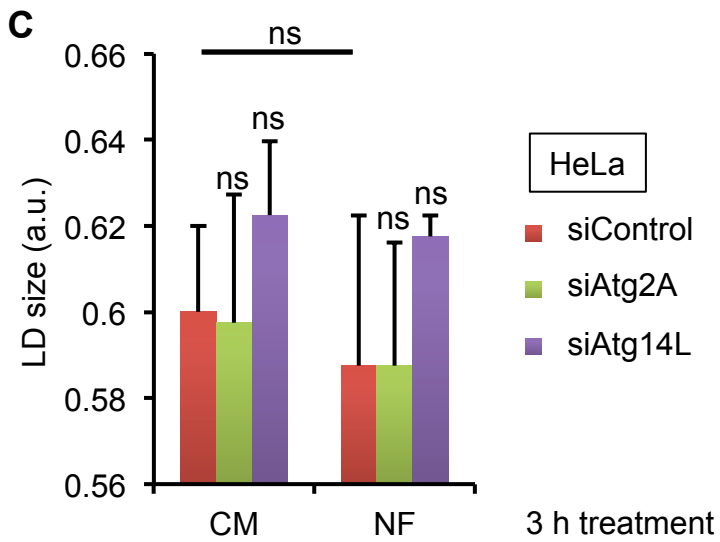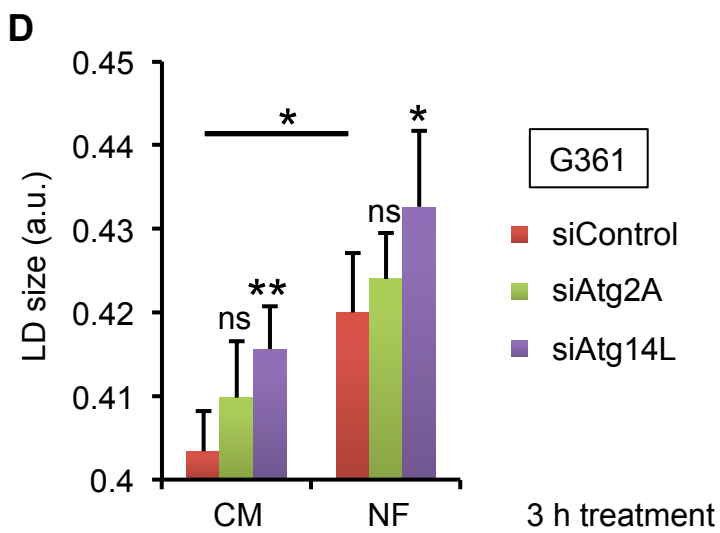

A

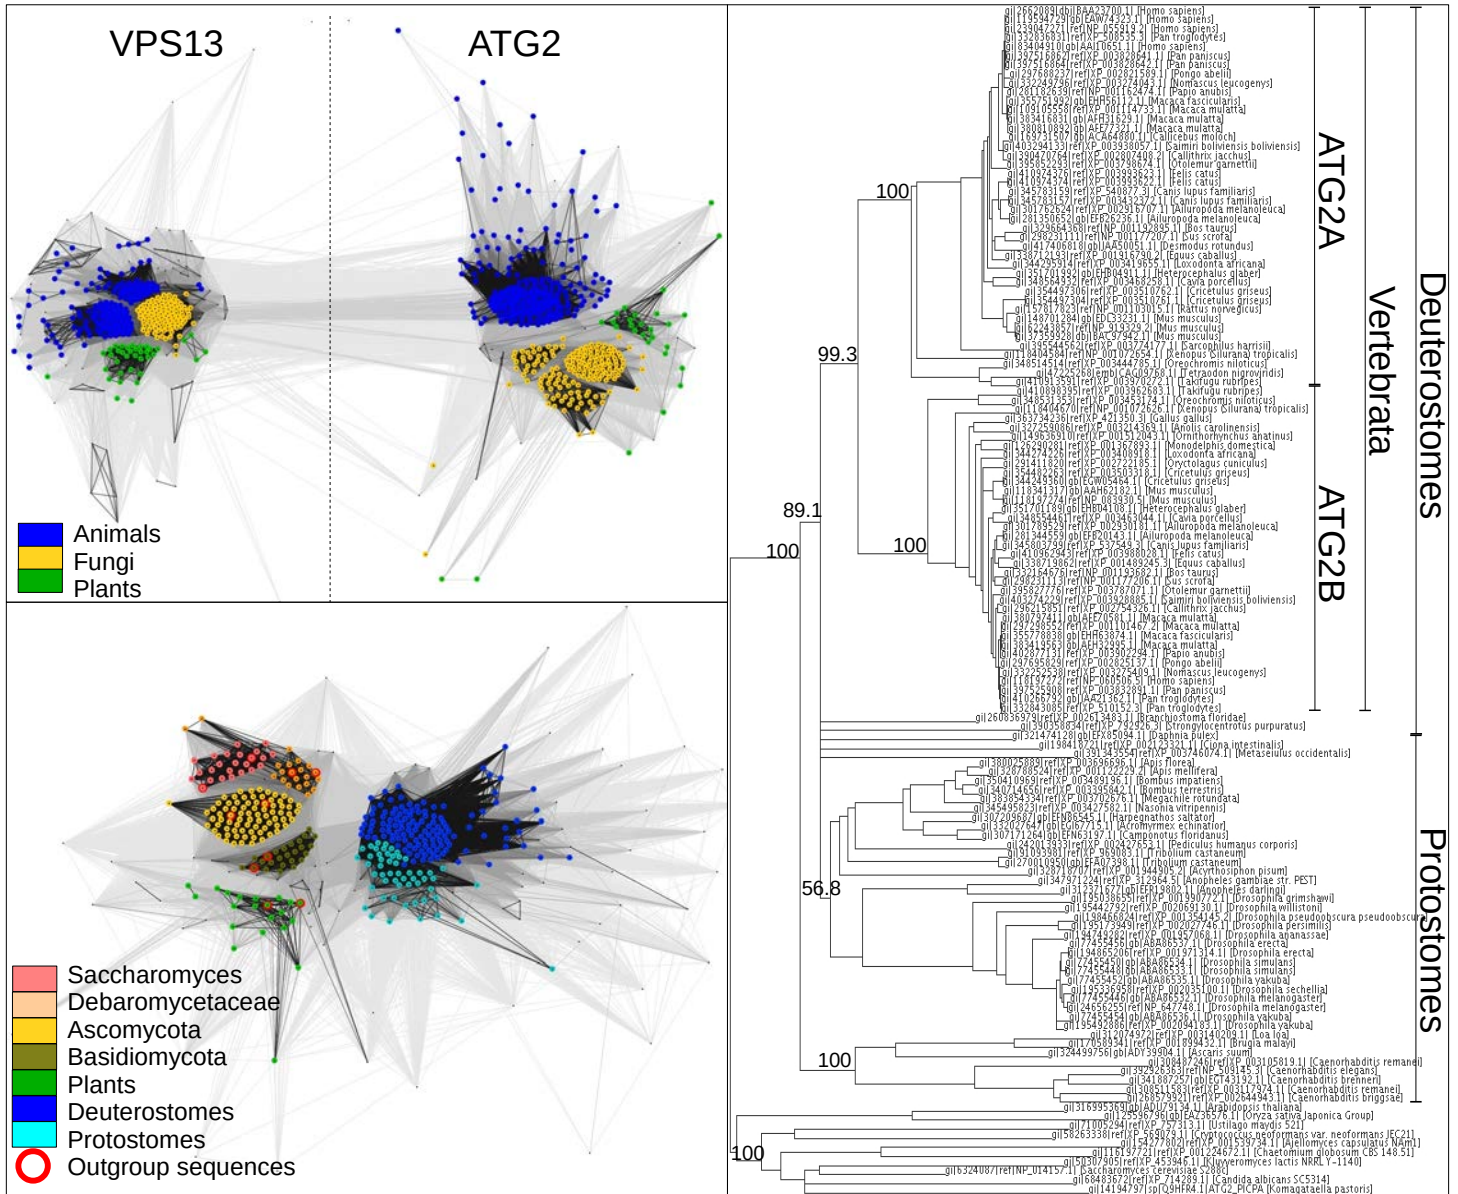

B

C

Supplement: supp_M046359_jlr.M046359-2.pdf [file supp_M046359_jlr.M046359-2.pdf]
